# Supplementary material for: A comparison between predetermined and self-selected approaches in resistance training: effects on power performance and psychological outcomes among elite youth athletes
Source: PeerJ. 2020 Nov 12;8:e10361. doi: 10.7717/peerj.10361 (PMC7666817; doi:10.7717/peerj.10361)
Supplement: Supplemental Information 1 — Raw data includes the participants’ characteristics and the individual data points collected during the mechanical responses monitoring, rate of fatigue and enjoyment (PACES) questionnaires. [file peerj-08-10361-s001.xlsx]

## Sheet: Participants info
Subject	Anthropometrics					Optimum power loads				Mean propulsive velocity for OPL
	Age (yrs)	Sex	Height (cm)	Body Mass (kg)	Sum of 8 skinfolds (mm)	Back squat	Jump squat	Bench press	Bench throw	Back squat	Jump squat	Bench press	Bench throw
1	14	Male	176.2	63.3	50.1	24	22	24	12	0.895	1.04	0.765	0.811
2	14	Male	178.3	57.4	57.6	43	21	43	31	0.798	1.013	0.811	0.823
3	14	Male	168.3	54.3	67.8	22	11	27	21	0.766	1.207	0.807	0.878
4	14.2	Male	166.8	48.3	56.9	21	10	21	20	0.864	1.131	0.823	0.854
5	13.4	Female	166.5	60.2	122.1	34	22	20	10	0.799	1.032	0.831	0.867
6	14.7	Male	172.5	65.8	65.4	46	33	31	28	0.822	1.103	0.802	0.891
7	15.1	Male	177	66.5	126.8	57	33	27	23	0.882	1.113	0.811	0.901
8	14.8	Male	152.6	41.9	40.6	27	28	22	18	0.743	1.003	0.756	0.801
9	15	Female	166.3	57	107	43	22	23	16	0.742	0.997	0.769	0.763
10	15.4	Male	173.2	74.2	170.3	50	45	35	20	0.721	0.989	0.801	0.813
11	15.4	Male	186.2	76.5	86.4	51	55	41	30	0.727	0.923	0.734	0.756
12	16.3	Male	175.6	65.6	68.7	26	43	36	23	0.922	1.034	0.901	0.893
13	16	Female	166.7	56.9	92	33	31	28	21	0.77	0.982	0.823	0.834
14	15.8	Male	177	62.4	64	35	42	40	22	0.822	0.845	0.856	0.871
15	14.9	Male	177.4	60.7	50.7	44	42	24	27	0.743	0.889	0.812	0.834
16	18.8	Male	177.5	77.5	59	25	44	40	18	0.945	1.034	0.989	0.999
17	16.1	Male	176.8	70.2	60	48	54	38	29	0.988	1.028	0.975	0.993
									Mean	0.820529	1.02135	0.827412	0.857765
									Stdev	0.0823082	0.0881277	0.0697523	0.0671859

## Sheet: Reliability Back squat
Subject	Self-selected_S1	Self-selected_S2	Predetermined_S1	Predetermined_S2	CV%
1	0.844	0.823	0.845	0.864	1.98497
2	0.764	0.734	0.789	0.767	2.96075
3	0.748	0.723	0.755	0.762	2.27446
4	0.834	0.799	0.823	0.845	2.38354
5	0.783	0.765	0.756	0.773	1.49496
6	0.811	0.804	0.823	0.831	1.47639
7	0.812	0.783	0.767	0.804	2.57792
8	0.723	0.704	0.745	0.732	2.37245
9	0.741	0.723	0.743	0.765	2.31557
10	0.699	0.743	0.685	0.732	3.81343
11	0.701	0.678	0.732	0.721	3.35632
12	0.878	0.823	0.889	0.811	4.58274
13	0.671	0.656	0.689	0.711	3.47808
14	0.803	0.756	0.832	0.822	4.19772
15	0.711	0.719	0.679	0.734	3.26621
16	0.855	0.812	0.843	0.865	2.72571
17	0.964	0.923	0.978	0.992	3.08853

## Sheet: Reliability Squat jump
Subject	Self-selected_S1	Self-selected_S2	Predetermined_S1	Predetermined_S2	CV%
1	0.995	0.989	1.001	0.967	1.50125
2	0.998	0.956	0.923	0.989	3.53455
3	1.004	1.103	1.093	1.023	4.69498
4	1.087	1.095	1.103	1.056	1.89495
5	0.978	0.983	1.021	0.967	2.37747
6	1.005	0.995	0.985	1.034	2.10405
7	1.089	1.101	0.998	1.094	4.53837
8	0.998	0.989	1.001	0.987	0.684351
9	0.976	0.981	1.005	0.978	1.36962
10	0.978	0.967	0.943	0.983	1.83954
11	0.893	0.911	0.921	0.878	2.11883
12	1.011	0.993	0.978	1.021	1.9071
13	0.921	0.965	0.945	0.978	2.61115
14	0.823	0.831	0.836	0.849	1.30637
15	0.865	0.845	0.884	0.867	1.84526
16	1.031	1.028	1.021	1.012	0.825602
17	0.978	1.021	0.998	1.011	1.85281

## Sheet: Reliability Bench press
Subject	Self-selected_S1	Self-selected_S2	Predetermined_S1	Predetermined_S2	CV%
1	0.743	0.753	0.761	0.738	1.37234
2	0.789	0.767	0.803	0.807	2.28234
3	0.783	0.769	0.801	0.793	1.75412
4	0.81	0.806	0.795	0.818	1.1855
5	0.821	0.804	0.816	0.816	0.887739
6	0.789	0.779	0.801	0.778	1.36256
7	0.803	0.789	0.805	0.795	0.926528
8	0.745	0.742	0.734	0.751	0.951691
9	0.745	0.751	0.736	0.761	1.40327
10	0.789	0.765	0.8	0.793	1.93148
11	0.711	0.704	0.699	0.721	1.34533
12	0.867	0.874	0.882	0.871	0.727058
13	0.81	0.789	0.821	0.795	1.80404
14	0.834	0.821	0.804	0.849	2.31332
15	0.756	0.789	0.806	0.804	2.93044
16	0.934	0.954	0.923	0.964	1.97358
17	0.954	0.931	0.943	0.954	1.1602

## Sheet: Reliability Bench throw
Subject	Self-selected_S1	Self-selected_S2	Predetermined_S1	Predetermined_S2	CV%
1	0.789	0.765	0.781	0.803	2.02218
2	0.798	0.812	0.811	0.785	1.58638
3	0.811	0.823	0.843	0.799	2.2908
4	0.811	0.832	0.829	0.805	1.6205
5	0.812	0.832	0.805	0.843	2.13474
6	0.856	0.832	0.854	0.821	2.03102
7	0.854	0.846	0.876	0.894	2.50704
8	0.767	0.745	0.765	0.783	2.03631
9	0.721	0.734	0.751	0.721	1.94349
10	0.788	0.754	0.768	0.784	2.01808
11	0.734	0.743	0.711	0.732	1.8548
12	0.834	0.854	0.851	0.841	1.08893
13	0.789	0.832	0.779	0.811	2.94505
14	0.832	0.843	0.854	0.821	1.69563
15	0.821	0.799	0.801	0.793	1.51236
16	0.945	0.921	0.954	0.921	1.8027
17	0.934	0.954	0.961	0.921	1.94582

## Sheet: Back Squat
Subject	Self-selected_Back squat_Rep1	Self-selected_Back squat_Rep2	Self-selected_Back squat_Rep3	Self-selected_Back squat_Rep4	Self-selected_Back squat_Rep5	Self-selected_Back squat_Rep6	Predetermined_Back squat_Rep1	Predetermined_Back squat_Rep2	Predetermined_Back squat_Rep3	Predetermined_Back squat_Rep4	Predetermined_Back squat_Rep5	Predetermined_Back squat_Rep6
1	11.1996	12.1461	11.0151	11.9887	10.4172	12.4227	12.7425	12.4294	13.2998	13.6591	12.5297	12.9705
2	10.8106	11.2203	10.2682	8.89955	9.52725	10.5659	11.1939	10.2155	9.29019	8.01786	9.35206	9.18918
3	11.1161	8.47415	10.6277	10.9715	9.79905	9.8667	10.8308	11.7954	10.9081	8.75511	10.8032	10.2176
4	13.313	13.2739	14.1576	13.4786	12.6576	12.8352	7.95695	6.43272	7.39548	6.38781	6.70491	5.99493
5	13.1959	11.8761	13.6763	12.071	13.1749	11.0921	12.5735	13.6031	12.8784	13.1025	12.6218	12.3981
6	13.0563	10.4543	12.3073	11.0368	12.7391	11.5826	10.7962	9.78551	10.5202	11.6483	10.0362	11.146
7	8.63824	8.67841	8.64278	8.70309	8.67651	8.17766	9.28122	10.3293	8.78154	9.01579	9.10743	9.51818
8	11.078	11.7301	11.7346	11.4465	10.7639	10.1266	13.152	13.006	12.7668	12.2009	11.7221	11.43
9	15.4694	17.5273	14.8779	15.228	14.6892	16.0652	15.6852	15.8773	13.4349	16.406	15.3059	14.9674
10	8.99054	10.076	8.94066	9.21232	8.81036	8.27409	9.67457	9.71107	8.82684	9.04745	8.68884	8.70929
11	11.4418	10.3626	10.5135	9.09534	10.8969	10.4233	11.8987	10.8319	10.3387	11.0595	10.2824	10.1345
12	11.1007	9.54828	8.81431	9.94023	10.0823	9.4785	10.3469	10.7315	9.92032	9.31762	9.97859	12.2284
13	15.7043	17.1364	15.9548	15.6357	15.8283	15.2557	15.3974	16.0929	15.32	14.3033	14.2814	13.7927
14	13.6299	13.6346	12.4294	13.9963	13.926	12.5888	14.8869	13.8389	14.1299	14.1701	13.1104	12.6342
15	11.9984	11.8979	10.8819	12.7226	11.3747	10.258	10.7055	12.12	11.1177	11.6388	11.206	10.5485
16	10.1404	9.76611	9.49882	9.56299	8.45227	8.83388	9.31043	9.62076	9.05571	9.58432	9.32746	8.65319
17	11.1926	10.6969	9.90993	10.3154	11.1535	10.283	9.89212	8.52484	9.32352	8.75441	9.55929	9.27444

## Sheet: Squat Jump
Subject	Self-selected_Squat jump_Rep1	Self-selected_Squat jump_Rep2	Self-selected_Squat jump_Rep3	Self-selected_Squat jump_Rep4	Self-selected_Squat jump_Rep5	Self-selected_Squat jump_Rep6	Predetermined_Squat jump_Rep1	Predetermined_Squat jump_Rep2	Predetermined_Squat jump_Rep3	Predetermined_Squat jump_Rep4	Predetermined_Squat jump_Rep5	Predetermined_Squat jump_Rep6
1	4.32752	4.21135	3.4347	3.54951	3.8037	3.84847	4.35313	4.65738	4.22278	4.65813	4.17899	4.26093
2	2.19049	2.07615	2.14094	2.41437	2.32751	2.08172	2.00478	2.52025	2.68587	2.53191	2.33309	1.8165
3	3.98596	4.40324	3.99808	3.69789	3.60848	4.0174	2.49082	2.44335	2.42442	1.97171	2.46789	2.10575
4	4.07797	3.98934	3.53512	3.36702	3.32613	3.37731	3.65141	4.22205	3.35709	4.04876	2.50205	3.4406
5	5.81577	5.77439	5.64461	5.40357	5.70767	5.00803	6.27691	5.54338	5.49189	5.51049	5.62672	5.36786
6	5.59896	5.4741	5.93847	6.09578	6.10455	6.38785	5.47689	5.04106	6.53961	6.00459	5.62706	5.37019
7	3.10318	3.23487	2.96004	2.95915	3.06612	3.19969	3.56824	3.38087	3.45895	2.69139	2.95758	2.84242
8	5.85003	5.5466	5.02588	5.65486	5.39932	5.39819	6.22585	5.56573	5.92351	5.51192	5.35264	5.49236
9	5.87408	6.29459	6.08834	6.02528	6.24421	6.38995	5.7213	6.75283	5.83094	5.97413	5.90746	5.84978
10	4.79527	3.51699	4.66226	3.60351	4.63785	3.37933	4.78079	4.46853	4.55861	4.596	4.73477	4.78153
11	9.94256	9.67718	9.32193	8.6069	8.98687	8.60091	5.87323	5.67087	5.94517	6.01052	5.75559	5.73516
12	6.21631	5.14797	5.37796	5.21482	5.49533	5.70689	5.14458	5.41305	5.74604	5.30418	5.3227	5.70764
13	6.16063	6.4957	6.03345	6.0859	5.92371	5.48031	6.23825	6.26032	5.77605	5.85886	5.69104	5.53917
14	7.14925	7.08436	6.76929	6.74969	6.56313	6.32223	6.77556	7.01973	6.63141	6.54601	6.44616	6.27877
15	3.97108	3.72716	3.56044	3.82986	3.68172	3.5592	4.12005	4.58866	4.19591	4.16819	4.5409	4.35433
16	5.21497	5.28167	4.96148	5.01284	5.08615	5.75403	4.68204	4.19667	4.35772	4.49506	4.41943	4.70783
17	5.07964	5.31144	5.06686	5.03707	5.21252	5.13211	4.47789	4.40076	4.12361	4.6136	4.7632	3.58586

## Sheet: Bench Press
Subject	Self-selected_Bench press_Rep1	Self-selected_Bench press_Rep2	Self-selected_Bench press_Rep3	Self-selected_Bench press_Rep4	Self-selected_Bench press_Rep5	Self-selected_Bench press_Rep6	Predetermined_Bench press_Rep1	Predetermined_Bench press_Rep2	Predetermined_Bench press_Rep3	Predetermined_Bench press_Rep4	Predetermined_Bench press_Rep5	Predetermined_Bench press_Rep6
1	4.38568	4.72555	4.57569	3.96345	3.60616	4.06214	2.7567	2.60064	2.6052	2.37321	2.21544	2.07148
2	1.84285	1.80081	1.62995	1.34763	1.09895	1.0151	2.66514	2.55583	2.16388	1.90569	1.44881	1.34223
3	2.27067	2.47948	2.18565	1.91861	2.01104	1.94504	2.53176	2.08071	2.02009	1.76412	1.55303	1.66391
4	1.12845	1.00764	0.935603	0.884539	0.871553	0.833398	1.07962	0.977699	0.862728	0.885057	0.978257	0.828676
5	3.65972	3.47133	3.43278	3.59186	3.37306	3.20588	3.31606	3.50557	3.23429	3.14078	2.95385	2.94817
6	2.01089	1.91522	1.82333	1.82858	1.58173	1.78203	2.05511	1.92263	2.05465	1.78411	1.75431	1.63555
7	1.52049	1.74012	1.55186	1.5931	1.45948	1.22939	1.86177	1.64041	1.74672	1.62802	1.53568	1.39582
8	4.02783	3.71715	3.8227	3.63398	3.20942	3.0627	4.27686	3.7481	3.46421	3.65406	3.22525	2.96607
9	4.44377	4.48004	4.2711	4.15402	3.92413	3.71006	4.21733	3.86136	3.76164	3.71384	3.09187	3.10288
10	1.3268	1.28701	1.219	1.08344	1.0334	1.01643	1.84771	1.57755	1.61093	1.5728	1.44975	1.43477
11	2.63868	2.18066	1.9068	1.85804	1.56223	1.64021	1.85623	1.68427	1.31409	1.33624	1.13175	1.2298
12	3.51544	3.68872	3.57467	3.40299	3.11257	3.19768	3.65246	3.76	3.30439	3.75145	3.16202	3.03585
13	2.95449	2.83548	2.73753	2.5254	2.2822	2.02544	3.07376	2.80868	2.48635	2.19888	1.92483	2.05311
14	2.44493	2.7525	2.60903	2.37713	2.1651	2.09722	3.39247	3.0381	2.80371	2.68953	2.22618	2.27103
15	3.31165	3.07726	2.39805	2.23528	1.9748	1.62141	2.65555	2.60625	2.29445	2.18764	1.9798	1.77485
16	2.74517	2.98212	2.50279	2.55193	2.45033	2.3135	2.52867	2.42918	2.211	2.24593	2.21805	2.06701
17	1.20089	1.13183	1.17343	1.20232	1.10631	0.998267	0.970746	1.41357	0.82192	0.992635	0.875761	0.608423

## Sheet: Bench Throw
Subject	Self-selected_Bench throw_Rep1	Self-selected_Bench throw_Rep2	Self-selected_Bench throw_Rep3	Self-selected_Bench throw_Rep4	Self-selected_Bench throw_Rep5	Self-selected_Bench throw_Rep6	Predetermined_Bench throw_Rep1	Predetermined_Bench throw_Rep2	Predetermined_Bench throw_Rep3	Predetermined_Bench throw_Rep4	Predetermined_Bench throw_Rep5	Predetermined_Bench throw_Rep6
1	4.92451	3.79365	4.09996	4.03256	3.97599	4.00776	3.91185	4.16849	3.93017	3.65234	3.24885	3.76674
2	2.03902	1.99349	2.00037	1.74092	1.59114	1.5831	1.93772	1.78973	1.69309	1.56968	1.60775	1.57083
3	2.55617	2.21073	2.2723	2.10831	2.07937	1.7609	2.26117	2.15288	1.91061	2.27512	1.74705	1.77308
4	1.6214	1.41724	1.41714	1.43593	1.46307	1.34264	1.57214	1.29684	1.38726	1.36757	1.35517	1.28588
5	3.42041	3.31006	3.3153	3.2251	3.0466	3.01432	3.37709	3.11359	2.83472	2.78328	2.61193	2.58064
6	2.76019	2.54683	2.30649	2.43596	2.20672	2.2089	2.82969	2.60064	2.44836	2.3882	2.36685	2.39889
7	2.35359	2.18184	2.0652	2.2373	2.35325	2.19225	2.57547	2.42614	2.24474	2.3286	2.23372	2.22379
8	3.92072	3.88516	3.93562	3.61173	3.6889	3.40883	3.76878	3.35753	3.31397	3.10826	3.02016	3.05374
9	4.50195	4.723	4.56696	4.51448	4.46668	4.73362	4.50683	4.10618	4.28783	3.88876	4.15307	3.45378
10	2.20991	1.97601	2.09825	1.9982	1.82231	1.78544	2.74731	2.05623	2.19669	2.03382	1.91553	1.9668
11	3.16498	2.6325	3.01269	2.56097	2.46667	2.49123	2.65023	2.78413	2.66021	2.53846	2.3946	2.29688
12	4.33476	3.24478	3.39826	3.0305	3.02204	3.03136	4.00022	3.78039	3.8301	3.67633	3.42325	3.36846
13	4.60862	4.49516	4.30027	4.02488	4.0581	4.08074	4.39318	4.21843	4.16979	3.85021	3.97807	3.94319
14	3.79793	3.48478	3.4807	3.18669	3.05017	3.11131	3.7814	3.26002	3.52215	3.04074	3.12256	2.77221
15	4.59075	3.92979	3.53311	3.55135	3.80154	3.09118	3.8535	3.83271	3.83591	3.14932	2.82114	2.76333
16	3.40006	3.60595	3.45187	3.15888	3.19109	2.96956	3.41121	3.03669	2.88535	2.72927	2.68482	2.73096
17	2.48099	2.32878	2.46319	2.1124	2.26148	2.04732	2.46943	2.36557	2.17306	2.24098	1.98257	2.02736

## Sheet: ROF
Subject	Self-selected Squat	Predetermined Squat		Self-selected Jump Squat	Predetermined Jump Squat		Self-selected Bench Press	Predetermined Bench Press		Self-selected Bench Throw	Predetermined Bench Throw
1	7	6.5		6.5	7.5		6.5	7		6.5	7
2	6	5		6	5.5		6.5	6.5		5.5	6.5
3	2	5		3.5	5		3.5	5		5	4
4	5.5	6		7.5	6.5		7	7		8	7.5
5	4.5	3.5		4	4		4	4		4	4.5
6	4.5	3.5		5.5	4.5		6	4.5		6	5
7	7.5	6		7	7		6	6		5	5.5
8	5.5	3		6.5	5		5	4		5.5	4
9	6	7		7.5	8.5		5.5	6.5		3	7
10	3	5		5	5.5		4	6		6	6.5
11	7	5		6	7		7.5	8.5		8	8.5
12	6.5	7		7.5	8		6.5	6.5		7.5	7.5
13	4.5	7		6.5	7.5		6.5	6.5		7	5.5
14	6	4.5		7.5	6.5		5.5	5		5	4
15	5	4		7	5		5	7		6	6
16	7	9		9	10		8	10		8	10
17	8	6		7	8		7	8		8	7

[truncated: 3 more sheets: PACES, Exercises orders, Orders frequency]
